# Supplementary material for: A versatile and low-toxicity material for photothermal therapy in deeper tissues
Source: Royal Society of Chemistry journal article supplement (doi:10.1039/d0tb03000g), 2021-01-01
Supplement: d0tb03000g1.pdf [file d0tb03000g1.pdf]

## Supporting Information

### A Versatile and Low-Toxic Material for Photothermal Therapy in Deeper Tissues

Liguo Jin,<sup>†, ‡</sup> Yinyin Wang,<sup>‡</sup> Huan Ouyang,<sup>‡</sup> Yu Liu,<sup>‡</sup> Zhenling Zhu,<sup>†, ‡</sup> Shuhua Wang,<sup>†</sup>

Hongbo Xin,<sup>‡</sup> Xiaolei Wang\*,<sup>†, ‡</sup>

<sup>†</sup>College of Chemistry, Nanchang University, Nanchang, Jiangxi 330088, P.R. China.

<sup>‡</sup>The National Engineering Research Center for Bioengineering Drugs and the Technologies:

Institute of Translational Medicine, Nanchang University, Nanchang, Jiangxi 330088, P.R. China.

#### Corresponding Author

\* E-mail: [wangxiaolei@ncu.edu.cn](mailto:wangxiaolei@ncu.edu.cn) Tel: 0791-83827416.

## Table of contents

### 1. Experimental procedures

#### 1.1 Materials

#### 1.2 Synthesis of TPUU

#### 1.3 Characterizations of TPUU

#### 1.4 Synthesis of Au-Ns

#### 1.5 Characterizations of Au-Ns

#### 1.6 Agar-simulated experiments

#### 1.7 The ability to release drugs

#### 1.8 Photothermal effect of Au-Ns

#### 1.9 Hemolysis assay

#### 1.10 Cells culture

#### 1.11 Cytotoxicity assay

#### 1.12 Animal experiments

#### 1.13 Quantitative real-time polymerase chain reaction (RT-qPCR)

#### 1.14 Quantitative 16S ribosomal DNA (16S rDNA)

#### 1.15 Statistical analysis

### 2. Supplementary Figures

## 2. Supplementary Figures

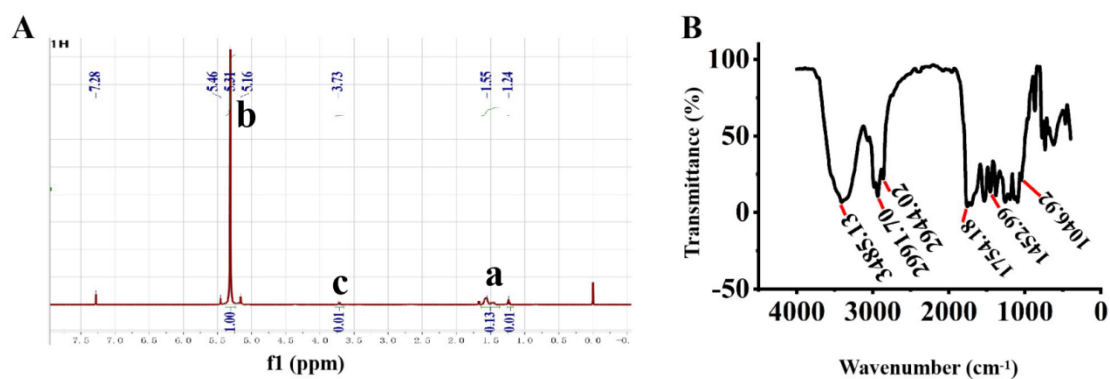

**Fig. S1. A.**  $^1\text{H}$ NMR spectrum of PDLLA; **B.** FTIR spectrum of PDLLA.

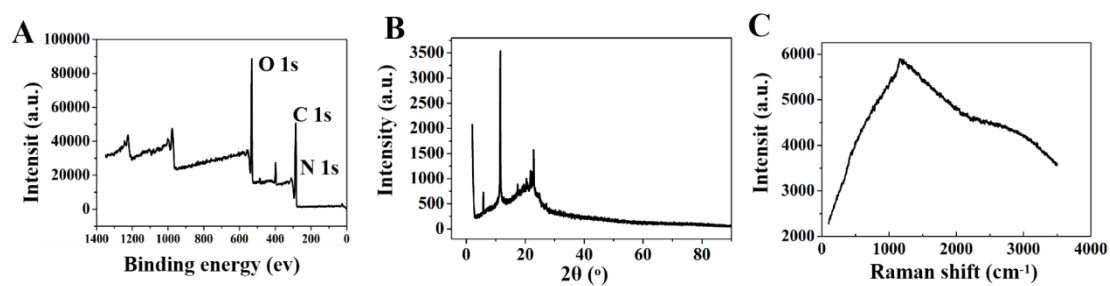

**Fig. S2. A.** XPS spectrum of TPUU; **B.** XRD analysis of TPUU; **C.** Raman spectrum of TPUU.

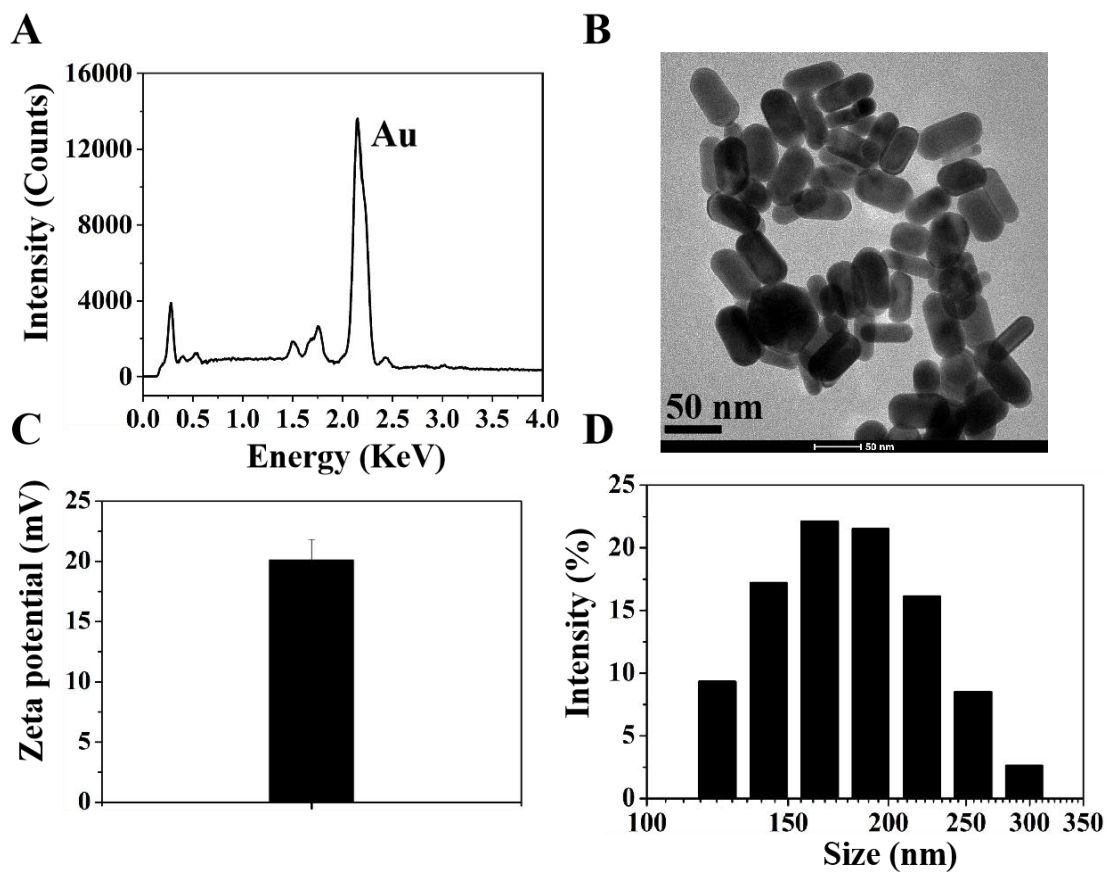

**Fig. S3.** **A.** EDS spectrum analysis of Au-Ns; **B.** TEM images of Au-Ns (Scale bar = 50 nm); **C.** Zeta potential of Au-Ns. **D.** Particle size of Au-Ns.

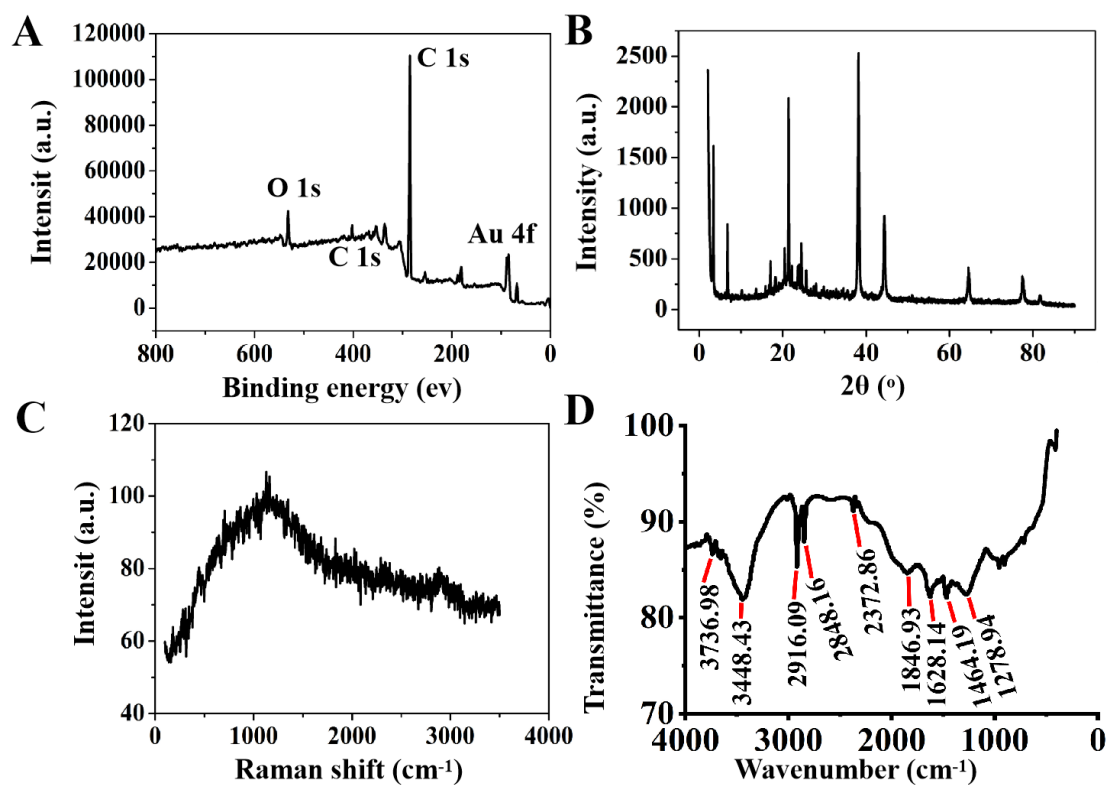

**Fig. S4.** **A.** XPS spectrum of Au-Ns; **B.** XRD analysis of Au-Ns; **C.** Raman spectrum of Au-Ns; **D.** FTIR spectrum of Au-Ns.

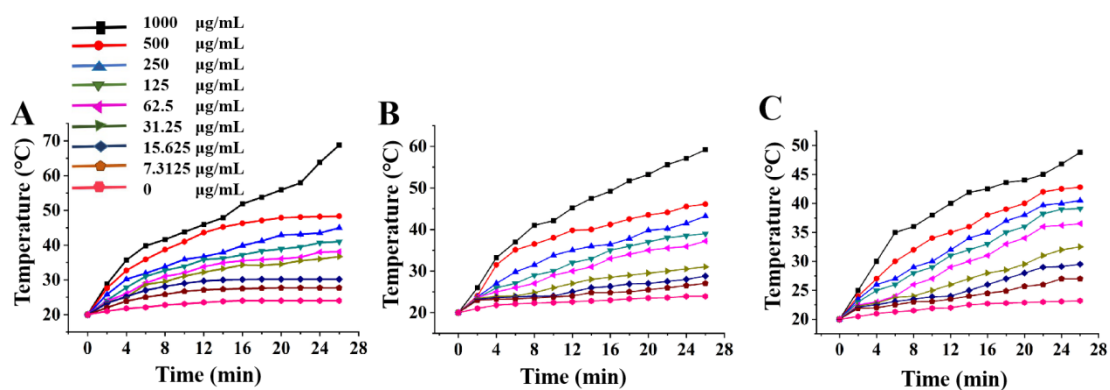

**Fig. S5.** The photothermal effect of Au-Ns on water as a control. **(A)** 2 W/cm<sup>2</sup>; **(B)** 1.5 W/cm<sup>2</sup>; **(C)** 0.6 W/cm<sup>2</sup>

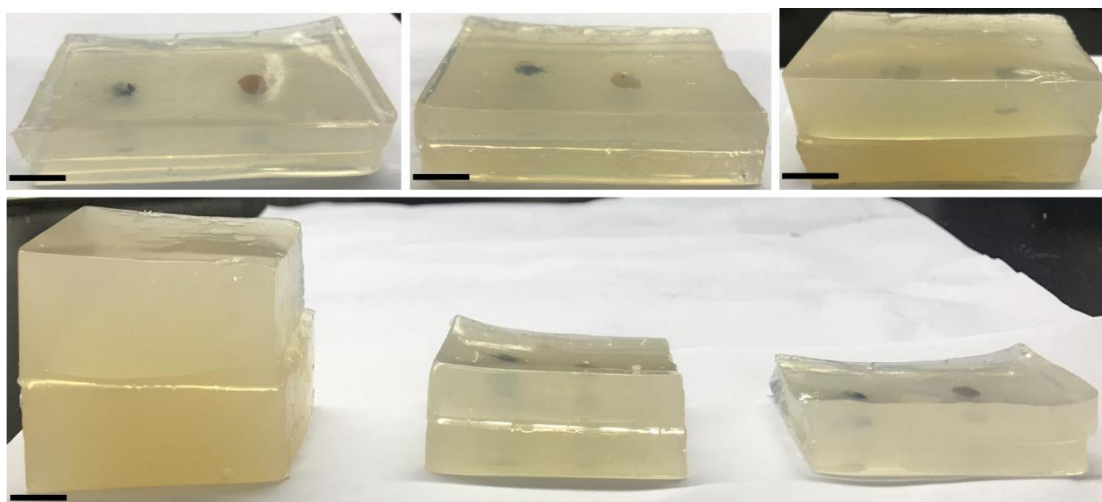

**Fig. S6.** Schematic representation of agar sandwiches. (Scale bar = 1 cm)

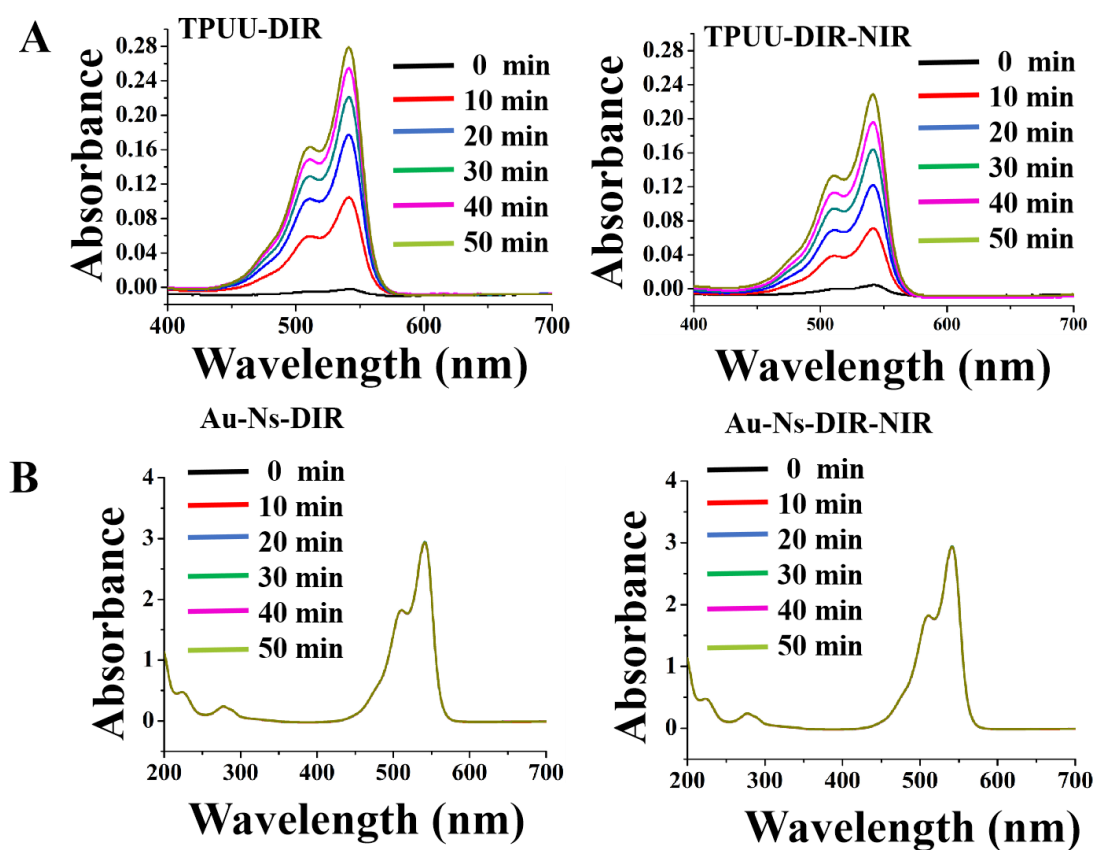

**Fig. S7.** Drugs release of DIR on TPUU and Au-Ns (DIR: 541 nm).

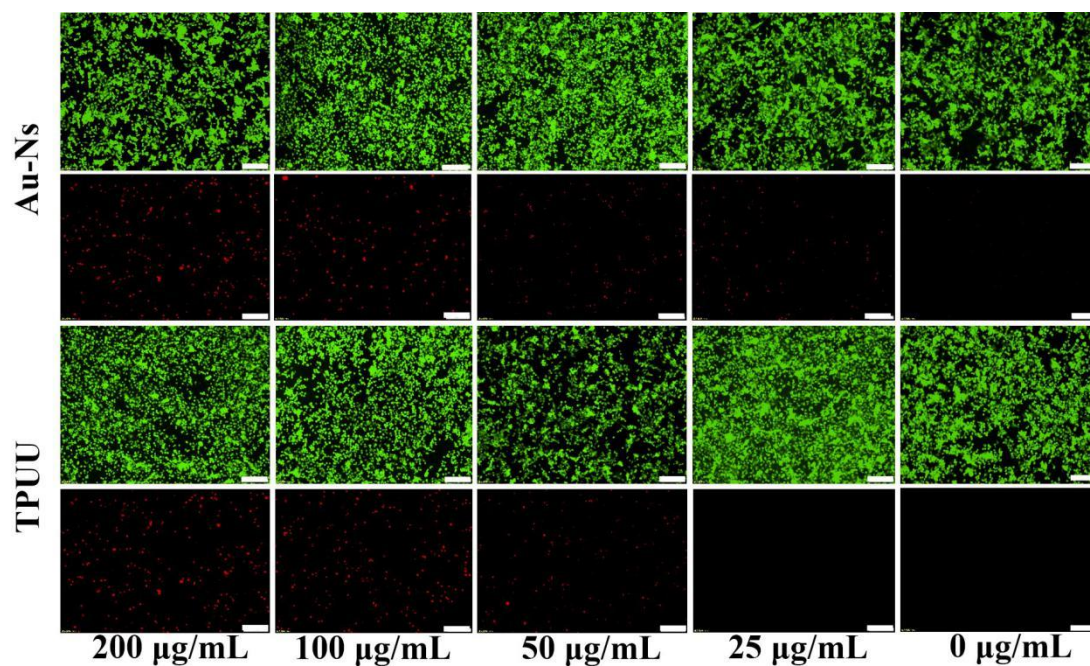

**Fig. S8.** Live/dead staining assay of 4T1 cells that were cultured in different concentrations for 24 h. Living cells and dead cells were stained with green and red fluorescence. (Scale bar = 100 μm).

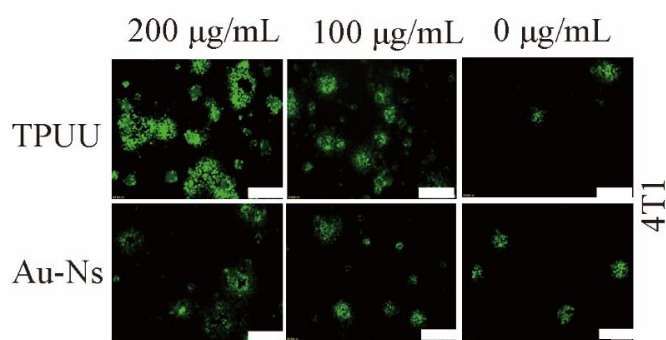

**Fig. S9.** The intracellular ROS content of 4T1 cells (Scale bar = 100 μm).

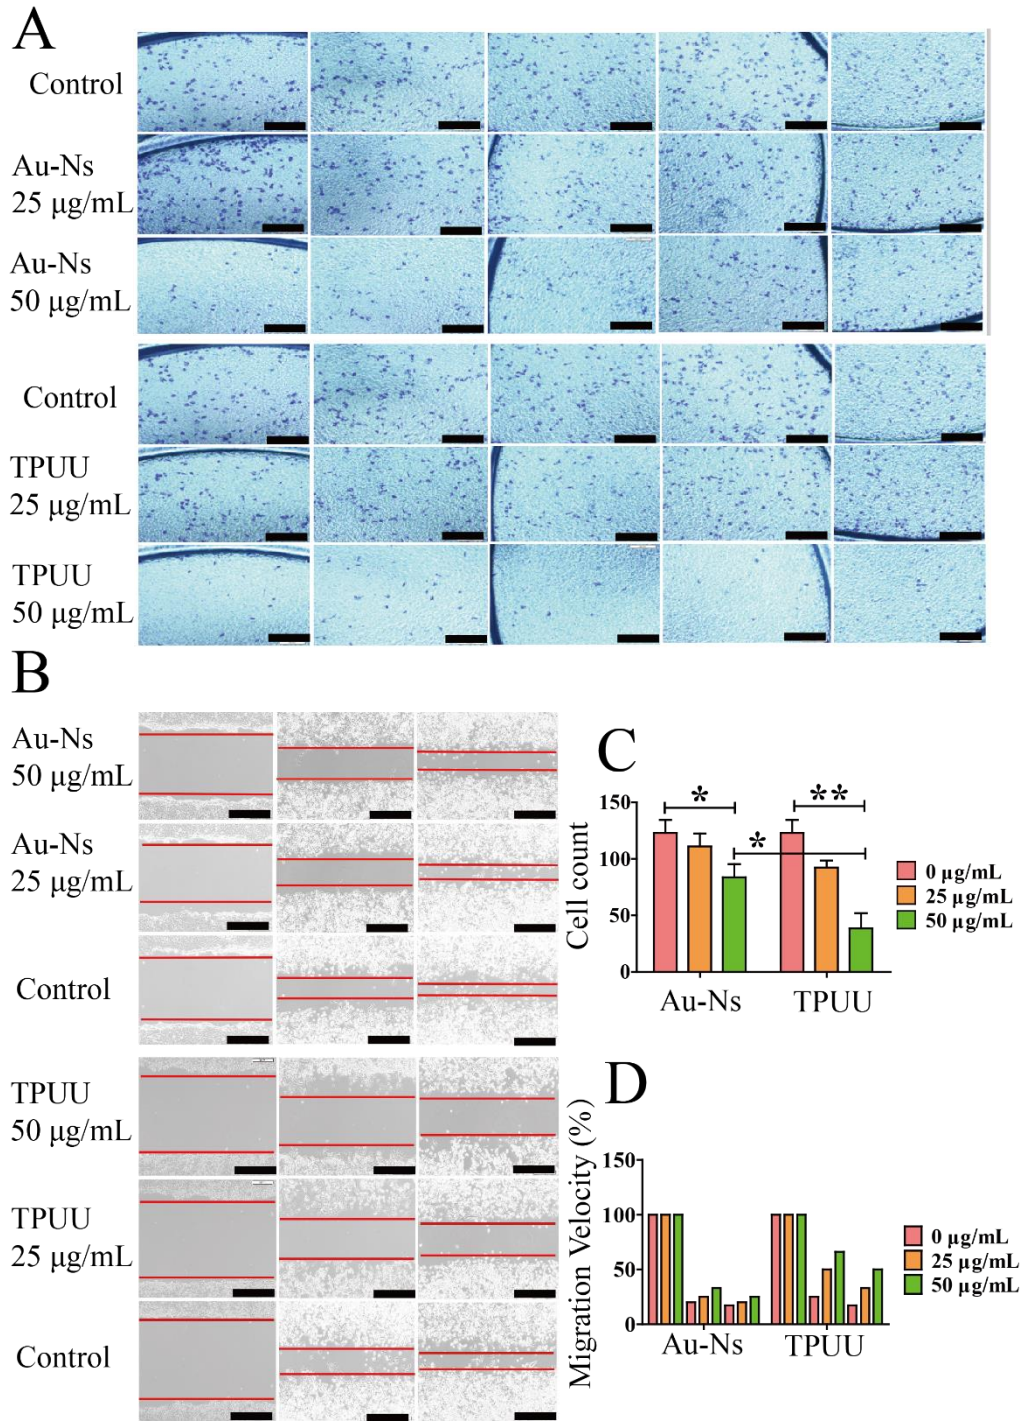

**Fig. S10.** Transwell assay of 4T1 cells that were cultured at different concentrations for 20 h (Scale bar = 100 µm). B. Scratch assay of 4T1 cells that were cultured with different concentrations for different time (Scale bar = 100 µm); C. Quantitative analysis of Transwell assay; D. Quantitative analysis of Scratch assay. (\* $P < 0.05$ , \*\* $P < 0.01$ , \*\*\* $P < 0.001$ . Error bars, SEM.)



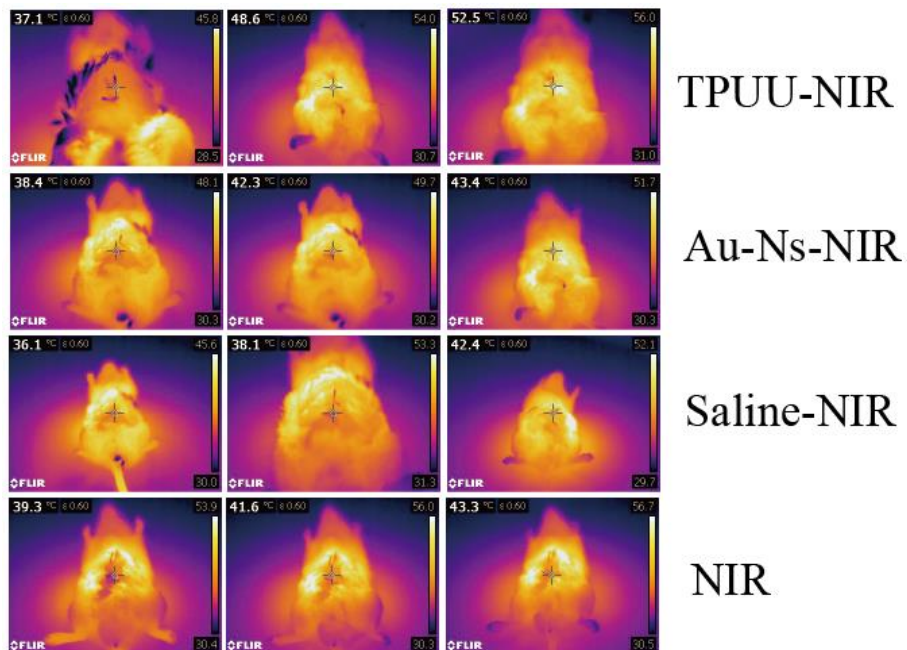

**Fig. 11.** The mouse intestine model was used to simulate the deep warming of TPUU *in vivo*, and photographed with an infrared camera under NIR irradiation.

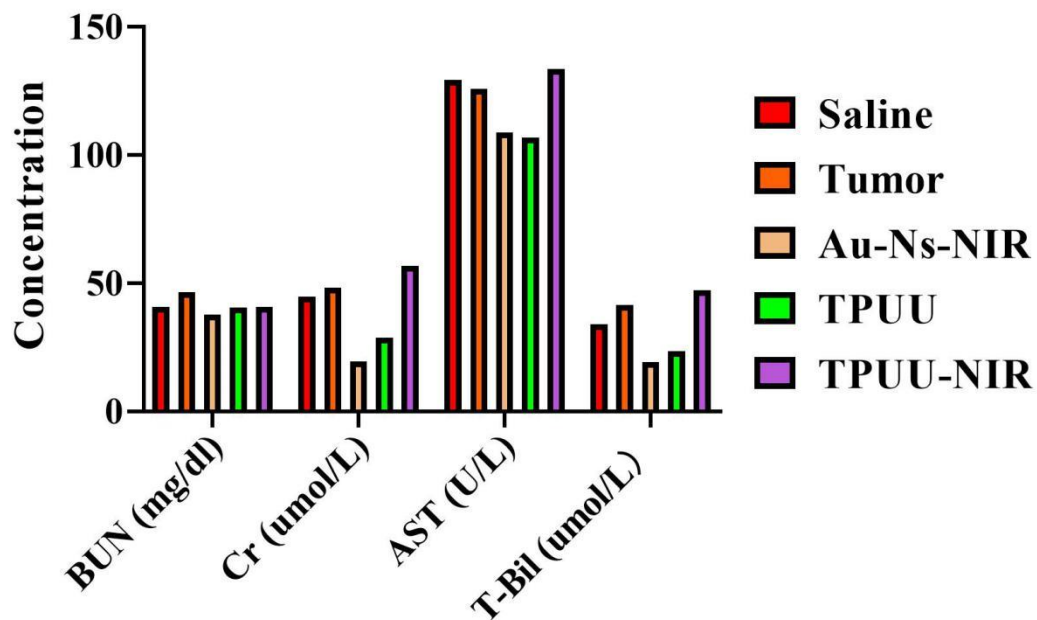

**Fig. 12.** Blood biochemical analysis of mice injected with the following groups: Saline, Tumor, Au-Ns-NIR, TPUU and TPUU-NIR.

|        | Normal Range                 | Saline | Tumor | TPUU  | TPUU-NIR | Au-Ns-NIR |
|--------|------------------------------|--------|-------|-------|----------|-----------|
| WBC    | 0.8-6.8 ( $10^9/L$ )         | 8.0    | 8.1   | 6.2   | 6.9      | 6.3       |
| Lymph  | 0.7-5.7 ( $10^9/L$ )         | 6.3    | 6.7   | 5.0   | 4.8      | 4.3       |
| Mon    | 0.0-0.3 ( $10^9/L$ )         | 0.2    | 0.2   | 0.2   | 0.3      | 0.4       |
| Gran   | 0.1-1.8 ( $10^9/L$ )         | 1.5    | 1.2   | 1.0   | 1.8      | 1.6       |
| Lymp % | 55.8-90.6 (%)                | 78.7   | 82.2  | 80.7  | 69.1     | 69.0      |
| Mon %  | 1.8-6.0 (%)                  | 2.7    | 2.8   | 3.0   | 4.4      | 5.8       |
| Gran % | 8.6-38.9 (%)                 | 18.6   | 15.0  | 16.3  | 26.5     | 25.2      |
| RBC    | 6.36-9.42<br>( $10^{12}/L$ ) | 5.08   | 5.92  | 9.60  | 5.78     | 9.33      |
| HGB    | 110-143 (g/l)                | 162    | 154   | 149   | 149      | 152       |
| HCT    | 34.6-44.6 (%)                | 26.4   | 33.3  | 47.6  | 29.8     | 47.3      |
| MCV    | 48.2-58.3 (fl)               | 52.1   | 56.3  | 49.6  | 51.6     | 50.7      |
| MCH    | 15.8-19 (pg)                 | 31.8   | 26.0  | 15.5  | 25.7     | 16.2      |
| MCHC   | 302-353 (g/l)                | 613    | 462   | 313   | 500      | 321       |
| RDW    | 13-17 (%)                    | 19.4   | 16.9  | 15.1  | 19.2     | 13.6      |
| PLT    | 450-1590<br>( $10^9/L$ )     | 1372   | 1003  | 877   | 1150     | 1040      |
| MPV    | 3.8-6.0 (fl)                 | 5.1    | 4.5   | 6.1   | 4.7      | 6.2       |
| PDW    |                              | 17.4   | 16.8  | 16.7  | 17.1     | 16.4      |
| PCT    | (%)                          | 0.699  | 0.451 | 0.534 | 0.540    | 0.644     |

**Table 1.** Blood biochemistry analysis of mice injected with the following groups: Saline,

Tumor, Au-Ns-NIR, TPUU and TPUU-NIR.
